# Supplementary material
Source: PubMed Central journal article supplement (PMC2495069)
Supplement: mmc1.pdf [file mmc1.pdf]

## Supplemental Data

### Evolutionary Forces Shape the Human *RFPL1,2,3* Genes

#### toward a Role in Neocortex Development

Jérôme Bonnefont, Sergey I. Nikolaev, Anselme L. Perrier, Song Guo, Laetitia Cartier, Silvia Sorce, T r se Laforge, Laetitia Aubry, Philipp Khaitovich, Marc Peschanski, Stylianos E. Antonarakis, and Karl-Heinz Krause

Figure S1. Phylogenetic tree based on RFPL coding sequences encoding the likely functional proteins in Laurasiatheria, Glires and Catarrhini

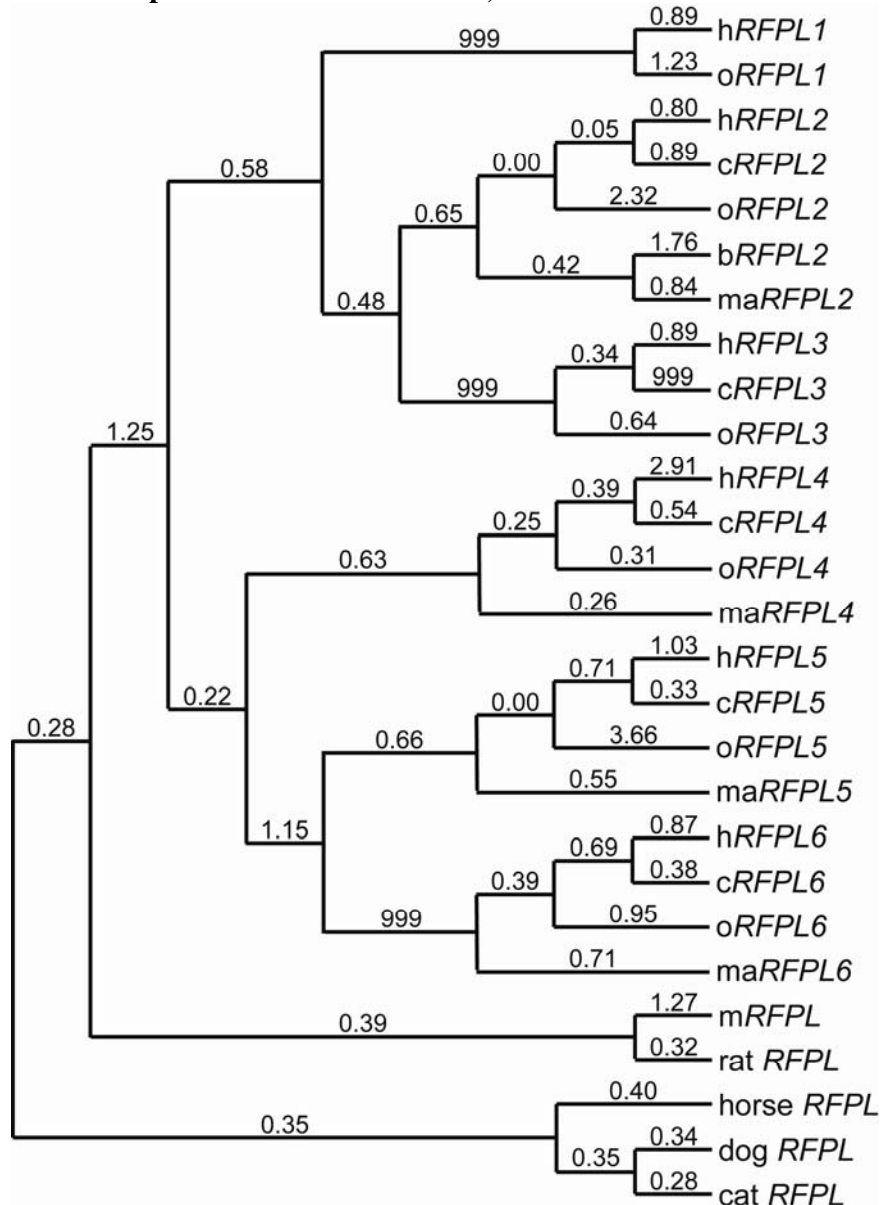

Maximum  $K_A/K_S$  values for each branch are indicated.

**Figure S2. Pax6 highly significantly modifies gene clusters implicated in the regulation of the cell cycle**

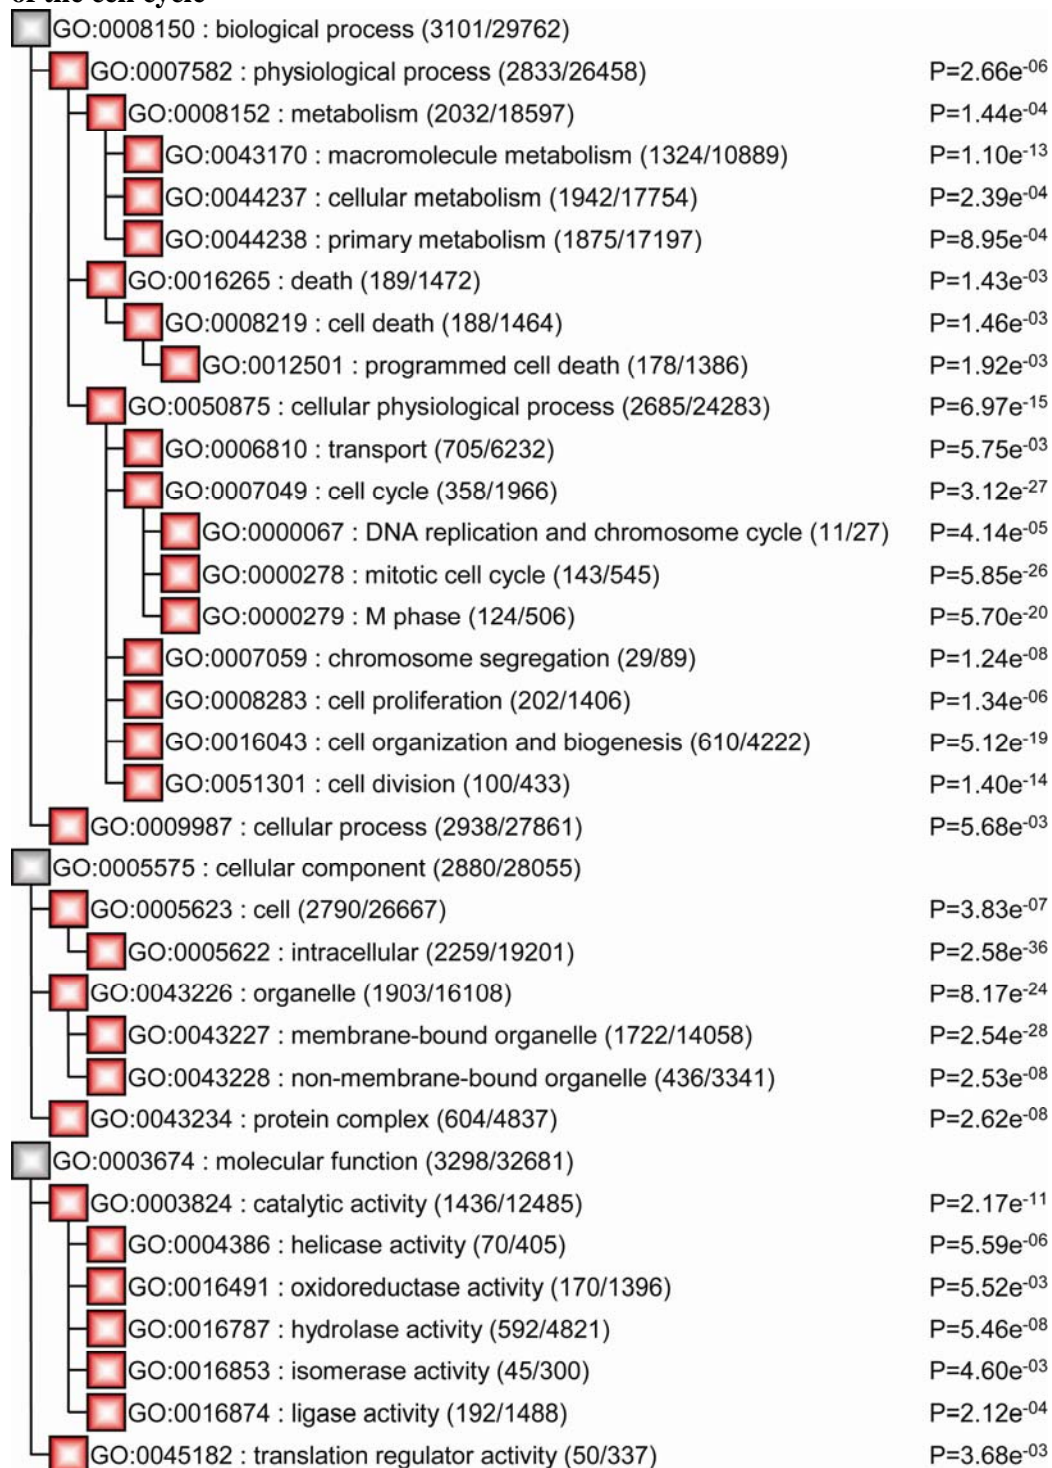

Pax6-elicited changes in gene cluster expressions observed in the biological process taxonomy defined by the Gene Ontology Consortium were determined using the GeneSpring GX 7 software. In parentheses are indicated the number of genes of the cluster that showed an altered expression over the total number of genes of the cluster.

Figure S3. mRFPL is not expressed in neural tissue

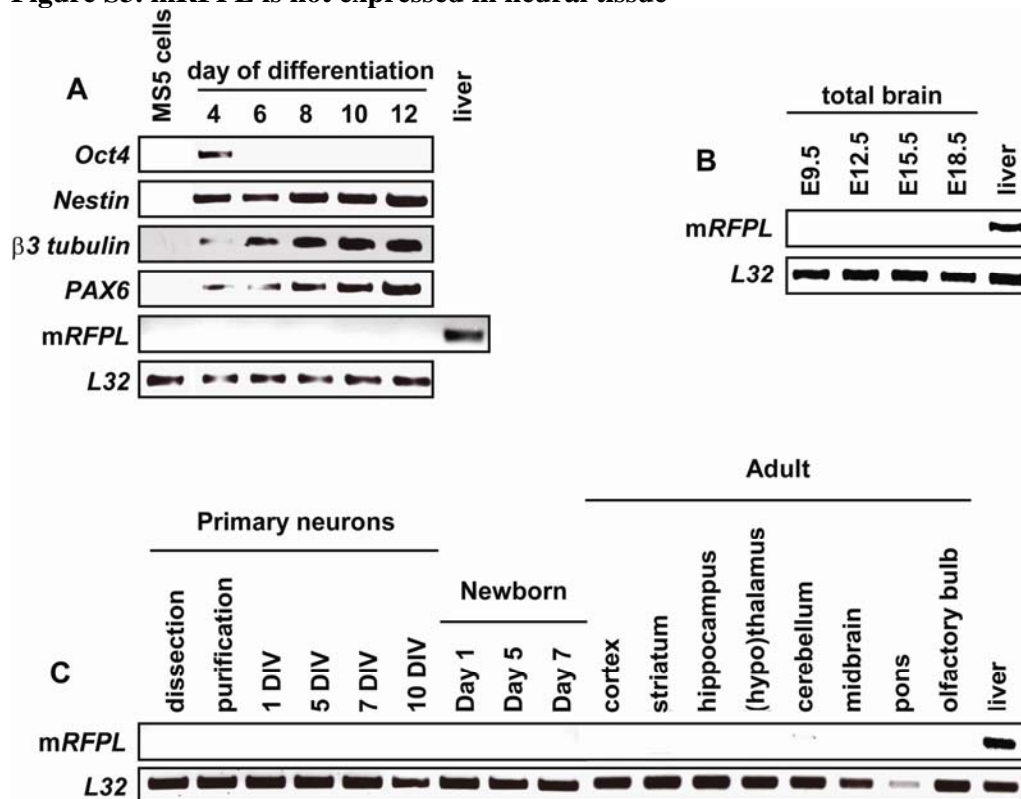

mRFPL expression was assessed by semi-quantitative end-point RT-PCR (A) during neurogenesis in differentiating murine D3 embryonic stem cells, (B) during neurogenesis in fetal brain, (C) during *in vitro* maturation of primary cortical neurons, and in newborn and adult mouse brain. Liver was used as a PCR positive control.

Figure S4. hRFPL4,5,6 genes are not expressed during neurogenesis *in vitro* and *in vivo*

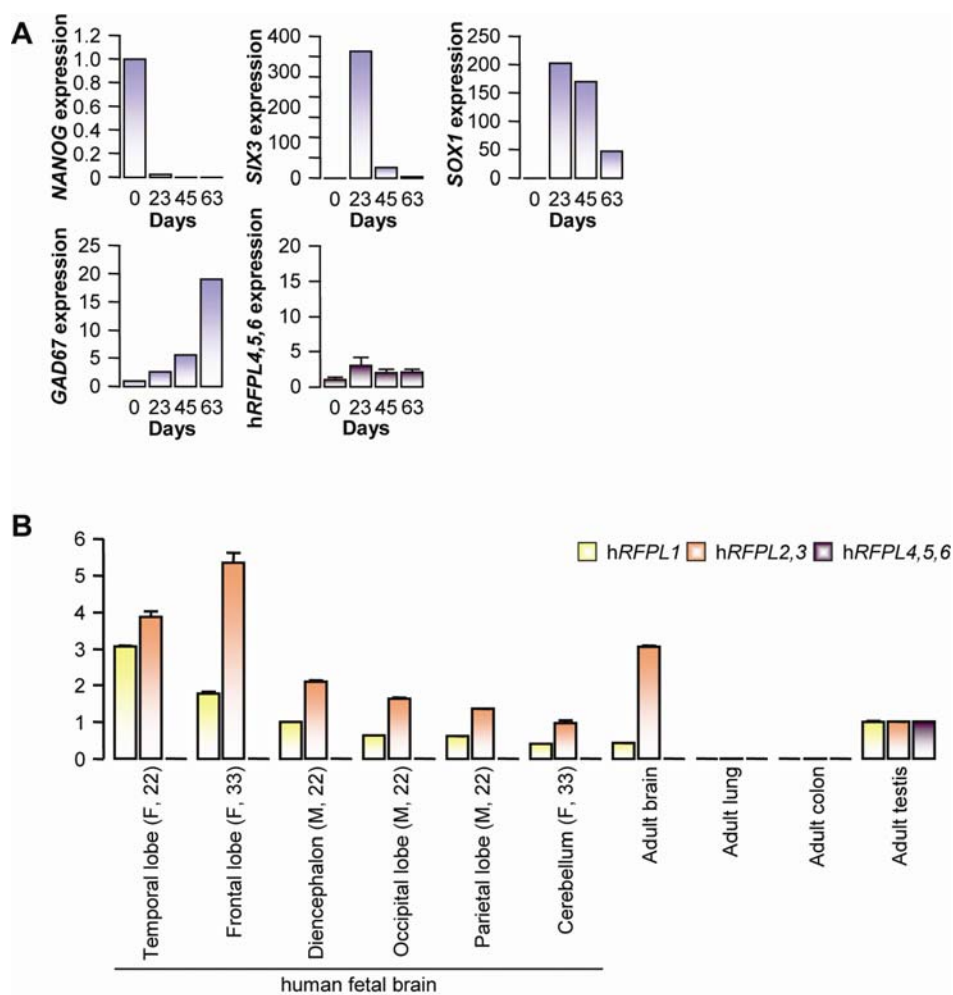

Transcript levels were assessed by real-time PCR and normalized to the cDNA level in adult testis. (A) hRFPL4,5,6 expressions were not seen in human embryonic stem cells-derived neurogenesis, nor (B) *in vivo* in developing or adult brain. The gender of the embryo (M: male; F: female) and its age in weeks are indicated in the parentheses. Results are displayed as mean  $\pm$  standard error (s.e.m.).

**Table S1. Oligonucleotide probes and conditions used for real-time PCR (qPCR) and semi-quantitative end-point RT-PCR**

| Gene                     | Primer sequences                                                         | Amplicon size | Tm | # cycles |
|--------------------------|--------------------------------------------------------------------------|---------------|----|----------|
| hRFPL1 (qPCR)            | F: CTg AAg gTg gTT CCC ATg TCT AT<br>R: gAC TTg gAg gAg CAA AAA ACA AgT  | 81            | -  | -        |
| hRFPL2-3 (qPCR)          | F: CAg TgA TgA TTC gTg ACT TTC CCA<br>R: TCC gAg AAC AAg ACC ATg AgT ACA | 100           | -  | -        |
| hRFPL4-6 (qPCR)          | F: CAT TCA TCg AgA TTC CTg TTT gC<br>R: CTg ATC ATC TTg ACT TCC ACg TTT  | 74            | -  | -        |
| hRFPL1 promoter          | F: ggg gAT gTg CTT gAg TgT TT<br>R: ggA AAA gTg CAC AAg ggA Ag           | 148           | 57 | 40       |
| hRFPL1 exon 2            | F: gAA CAA AAT CAg gCC CAg TT<br>R: CTT ggA ggA gCA AAA AAC AAg Tg       | 600           | 57 | 40       |
| hRFPL2 promoter          | F: CTA CTg CAT CCA gCC CCT CT<br>R: CTg ACC AAC ATg ggg AAA C            | 238           | 57 | 40       |
| hRFPL3 promoter          | F: TCC TgT gTT gTC CAg ACT Cg<br>R: gTg ggT ggA TCA TCT gAg gT           | 350           | 57 | 40       |
| hRFPL2/3 exon 2          | F: gAA CAA AAT CAg gCg CAA TC<br>R: AAg gAg CCA AAA ATg ggC              | 596           | 57 | 40       |
| murine Oct4              | F: ggA Tgg CAT ACT gTg gAC CT<br>R: AgA Tgg Tgg TCT ggC TgA AC           | 333           | 58 | 30       |
| murine Nestin            | F: CAg AgA ggC gCT ggA ACA gAg ATT<br>R: AgA CAT Agg Tgg gAT ggg AgT gCT | 469           | 61 | 32       |
| murine $\beta$ 3 tubulin | F: TCA gCg ATg AgC ACg gCA TA<br>R: CAC TCT TTC CgC ACg ACA TC           | 301           | 60 | 30       |
| murine Pax6              | F: ggg ggT CTg TAC CAA CgA TA<br>R: gTC CTC TCA AAC TCT TTC TC           | 369           | 58 | 30       |
| mRFPL                    | F: gCC CTg gTT ACC AAg ATC AA<br>R: gAT ATg ggA gCC ATC gCT AA           | 580           | 58 | 32       |
| L32                      | F: gTg AAg CCC AAg ATC gTC AA<br>R: TTg gTg ACT CTg ATg gCC Ag           | 349           | 58 | 26       |

**Table S2. Identification of the RFPL gene family**

| Species    | Gene name  | chr | strand | Method of detection                     | start codon | stop codon  | length | features                                         |
|------------|------------|-----|--------|-----------------------------------------|-------------|-------------|--------|--------------------------------------------------|
| Human      | hRFPL1     | 22  | +      | Refseq (NM_021026)                      | 28,164,572  | 28,168,444  | 3873   |                                                  |
|            | hRFPL2     | 22  | -      | Refseq (NM_006605)                      | 30,916,425  | 30,919,466  | 3042   |                                                  |
|            | hRFPL3     | 22  | +      | Refseq (NM_006604)                      | 31,083,854  | 31,087,148  | 3295   |                                                  |
|            | hRFPL4     | 19  | +      | UCSC blat                               | 60,980,742  | 60,982,099  | 1358   |                                                  |
|            | hRFPL5     | 19  | +      | UCSC blat                               | 60,964,979  | 60,966,350  | 1372   |                                                  |
|            | hRFPL6     | 19  | +      | UCSC blat                               | 60,974,983  | 60,976,354  | 1372   |                                                  |
| Chimpanzee | cRFPL1     | 22  | -/+    | UCSC blat+Human-Chimp genomic alignment | 28,278,755  | 28,285,339  | -      | Inversion of the first exon                      |
|            | cRFPL2     | 22  | -      | ENCODE genomic alignment                | 31,087,967  | 31,091,008  | 3042   |                                                  |
|            | cRFPL3     | 22  | +      | ENCODE genomic alignment                | 31,241,462  | 31,244,742  | 3281   |                                                  |
|            | cRFPL4     | 19  | +      | UCSC blat+Human-Chimp genomic alignment | 61,600,311  | 61,601,676  | 1366   |                                                  |
|            | cRFPL5     | 19  | +      | UCSC blat+Human-Chimp genomic alignment | 61,546,683  | 61,548,053  | 1371   |                                                  |
|            | cRFPL6     | 19  | +      | UCSC blat+Human-Chimp genomic alignment | 61,555,560  | 61,556,931  | 1372   |                                                  |
| Orangutan  | oRFPL1     | 22  | +      | UCSC blat                               | 24,355,245  | 24,359,130  | 3886   |                                                  |
|            | oRFPL2     | 22  | -      | UCSC blat                               | 27,200,319  | 27,202,725  | 2407   |                                                  |
|            | oRFPL3     | 22  | +      | UCSC blat                               | 27,442,559  | 27,445,224  | 2666   |                                                  |
|            | oRFPL4     | 19  | +      | UCSC blat                               | 57,598,445  | 57,599,839  | 1395   |                                                  |
|            | oRFPL5     | 19  | +      | UCSC blat                               | 57,705,733  | 57,707,257  | 1525   | Frame shift (173 AA only)                        |
|            | oRFPL6     | 19  | +      | UCSC blat                               | 57,620,267  | 57,621,670  | 1404   |                                                  |
| Macaque    | maRFPL1    | 10  | +      | UCSC blat+Human-Chimp genomic alignment | 73,271,517  | 73,272,096  | 580    | Only intron and exon 2; No ORF                   |
|            | maRFPL2    | 10  | -      | ENCODE genomic alignment                | 76,103,734  | 76,106,122  | 2389   | Frame shift (184 AA only)                        |
|            | maRFPL3    | 10  | +      | ENCODE genomic alignment                | 76,266,920  | 76,267,499  | 580    | Only intron and exon 2; No ORF                   |
|            | maRFPL4    | 19  | +      | UCSC blat                               | 61,808,701  | 61,810,062  | 1362   |                                                  |
|            | maRFPL5    | 19  | +      | ENCODE genomic alignment                | 61,784,808  | 61,786,175  | 1369   | Intron similar to human RFPL4,5                  |
|            | maRFPL6    | 19  | -      | ENCODE genomic alignment                | 61,792,106  | 61,793,454  | 1349   | Intron similar to human RFPL4,5                  |
| Baboon     | bRFPL2     |     |        | ENCODE genomic alignment                |             |             | 2377   |                                                  |
|            | bRFPL3     |     |        | ENCODE genomic alignment                |             |             | 580    | Only intron and exon 2; No ORF                   |
| Marmoset   | msRFPL1    |     | -      | UCSC blat                               | 73,002      | 74,111      | 1110   | contig 2246; only exon 1 and half intron; No ORF |
|            | msRFPL4    |     | +      | UCSC blat                               | 10,848      | 11,703      | 856    | contig 22460; No ORF                             |
|            | msRFPL5    |     | -      | UCSC blat                               | 21,714      | 22,585      | 872    | contig 5452; No ORF                              |
|            | msRFPL6    |     | +      | UCSC blat                               | 379,170     | 380,081     | 912    | contig 996; No ORF                               |
| Mouse      | mRFPL      | 7   | -      | Refseq (NM_138954)                      | 5,061,468   | 5,068,498   | 7031   |                                                  |
| Rat        | rat RFPL   | 1   | +      | UCSC blat                               | 67,466,536  | 67,471,161  | 4626   |                                                  |
| Horse      | horse RFPL | 10  | +      | UCSC blat                               | 19,719,133  | 19,721,529  | 2397   |                                                  |
| Dog        | dog RFPL   | 1   | +      | GeneWise Gene prediction                | 105,130,438 | 105,132,644 | 2207   |                                                  |
| Cat        | cat RFPL   |     | +      | UCSC blat                               | 1648        | 3467        | 1820   | scaffold_205584                                  |

BLAT Genome Assemblies used: Nov. 2004 (Rat), May 2005 (Dog), Jan. 2006 (Macaque), Mar. 2006 (Human, Chimpanzee, Cat), Jan. 2007 (Horse), June 2007 (Marmoset), July 2007 (Orangutan, Mouse).

**Table S3. Calculations of  $K_S$  divergence between hominoid RFPL1,2,3 genes and between human and marmoset genomes (as derived in Nikolaev et al.<sup>29</sup>)**

| Genes compared |                 | $K_S$ value |
|----------------|-----------------|-------------|
| hRFPL1         | hRFPL2          | 0.0501      |
| hRFPL1         | hRFPL3          | 0.0487      |
| hRFPL2         | hRFPL3          | 0.0256      |
| cRFPL1         | cRFPL2          | 0.0533      |
| cRFPL1         | cRFPL3          | 0.0521      |
| cRFPL2         | cRFPL3          | 0.0178      |
| oRFPL1         | oRFPL2          | 0.0157      |
| oRFPL1         | oRFPL3          | 0.0263      |
| oRFPL2         | oRFPL3          | 0.025       |
| Human genome   | Marmoset genome | 0.109       |

**Table S4. Parameter estimates and likelihood scores under models of variable  $K_A/K_S$  ratios ( $\Omega$ ) among sites of RFPL1-3 gene family**

| <b>Nested model pairs</b>       | <b>Average <math>\Omega</math> of PSS</b> | <b>Number of PSS</b> | <b>PSS (%)</b> | <b>Likelihood</b> | <b>LRT</b> | <b>P value</b> |
|---------------------------------|-------------------------------------------|----------------------|----------------|-------------------|------------|----------------|
| <b>background (branch-site)</b> |                                           |                      |                | -9433.184         |            |                |
| <b>foreground (branch-site)</b> | 4.90687                                   | 28(13)               | 9.8            | -9450.091         | 33.81343   | p<0.001        |
| <b>M1 neutral</b>               |                                           |                      |                | -9466.166         |            | df=2           |
| <b>M2 selection</b>             | 2.93946                                   | 19(8)                | 6.6            | -9440.341         | 51.65018   | p<0.001        |
| <b>M7 beta</b>                  |                                           |                      |                | -9463.333         |            | df=2           |
| <b>M8 beta &amp; omega</b>      | 2.48823                                   | 26(13)               | 9.1            | -9429.270         | 68.12613   | p<0.001        |

LRT: Likelihood Ratio Test; PSS: positively selected sites with posterior probabilities >50% (>95%); df: degrees of freedom.



**Table S5. Amino acid changes that occurred at sites inferred to have been potentially under positive selection in RFPL1,2,3 proteins (>95% with at least one model)**

| <b>Residue</b> | <b>Domain</b> | <b>Model 2</b> | <b>Model 8</b> | <b>Branch-site</b> |
|----------------|---------------|----------------|----------------|--------------------|
| 37             | RING          | 0.956          | 0.989          |                    |
| 61             | RING          |                |                | 0.952              |
| 83             | RING          |                |                | 0.981              |
| 87             | RING          |                |                | 0.997              |
| 89             | RING          |                |                | 0.992              |
| 90             | RING          |                |                | 0.996              |
| 93             | RDM           | 0.937          | 0.985          |                    |
| 95             | RDM           |                |                | 0.960              |
| 100            | RDM           |                |                | 0.962              |
| 112            | RDM           | 0.991          | 0.998          |                    |
| 113            | RDM           | 0.803          | 0.951          |                    |
| 151            | PRY           | 0.887          | 0.975          | 0.959              |
| 165            | PRY           | 0.996          | 0.999          | 0.957              |
| 169            | PRY           |                |                | 0.998              |
| 206            | SPRY          | 0.973          | 0.993          | 0.776              |
| 208            | SPRY          | 0.921          | 0.977          |                    |
| 213            | SPRY          | 0.975          | 0.993          | 0.994              |
| 222            | SPRY          | 0.994          | 0.998          |                    |
| 263            | SPRY          |                |                | 0.953              |
| 282            | SPRY          |                |                | 0.993              |
| 287            | SPRY          | 0.960          | 0.990          | 0.805              |
| 289            | SPRY          | 0.956          | 0.989          |                    |
| 304            | SPRY          | 0.942          | 0.983          | 0.919              |

Residue positions are indicated according to hRFPL1 protein sequence. Note that some RFPL1,2,3 proteins have a N-terminal 29 amino acid deletion.
